# Supplementary material for: Construction of a zeolite A-type multivariate metal–organic framework for selective sensing of Fe3+ and Cr2O72−
Source: Royal Society of Chemistry journal article supplement (doi:10.1039/d1ce00610j), 2021-01-01
Supplement: d1ce00610j1.pdf [file d1ce00610j1.pdf]

## Supplementary Material

### Construction of Zeolite A Type Multivariate Metal-Organic Framework for Selective Sensing of Fe<sup>3+</sup> and Cr<sub>2</sub>O<sub>7</sub><sup>2-</sup>

Khalid Talha<sup>a</sup>, Alamgir<sup>a</sup>, Naeem Ahmed<sup>b</sup>, Lin-Hua Xie,<sup>a</sup> Xin Zhang,<sup>\*a</sup> and Jian-Rong Li<sup>\*a</sup>

*<sup>a</sup>Beijing Key Laboratory for Green Catalysis and Separation and Department of Environmental  
Chemical Engineering, Faculty of Environment and Life, Beijing University of Technology,  
Beijing 100124, P. R. China*

*<sup>b</sup>Department of Chemistry, School of Natural Sciences, National University of Science and  
Technology, Islamabad, Pakistan*

\*Corresponding author.

E-mail address: zhang.xin@bjut.edu.cn; jrli@bjut.edu.cn

#Khalid Talha and Alamgir contributed equally to this work.

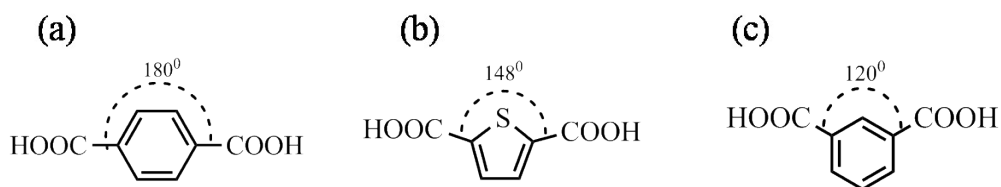

**Figure S1.** (a) linear linker; (b) the bent linker H<sub>2</sub>TDC with 148° for BUT-26 synthesis; (c) bent linker H<sub>2</sub>IPA with 120° angle for BUT-27 synthesis in this work.

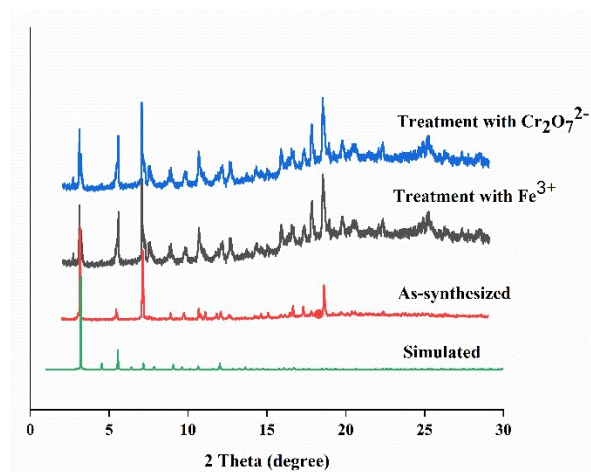

**Figure S2.** PXRD patterns BUT-27 with treatment of different ions.

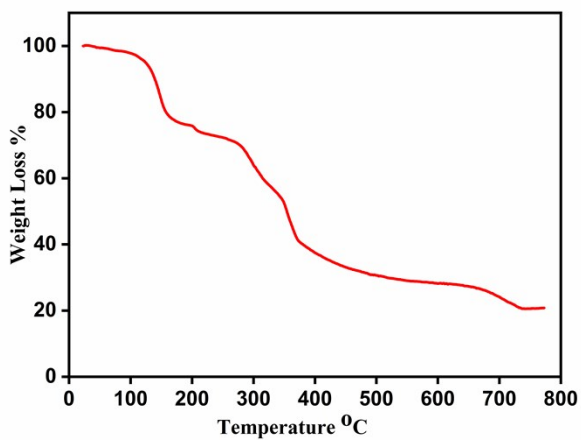

**Figure S3.** TGA curves of BUT-27.

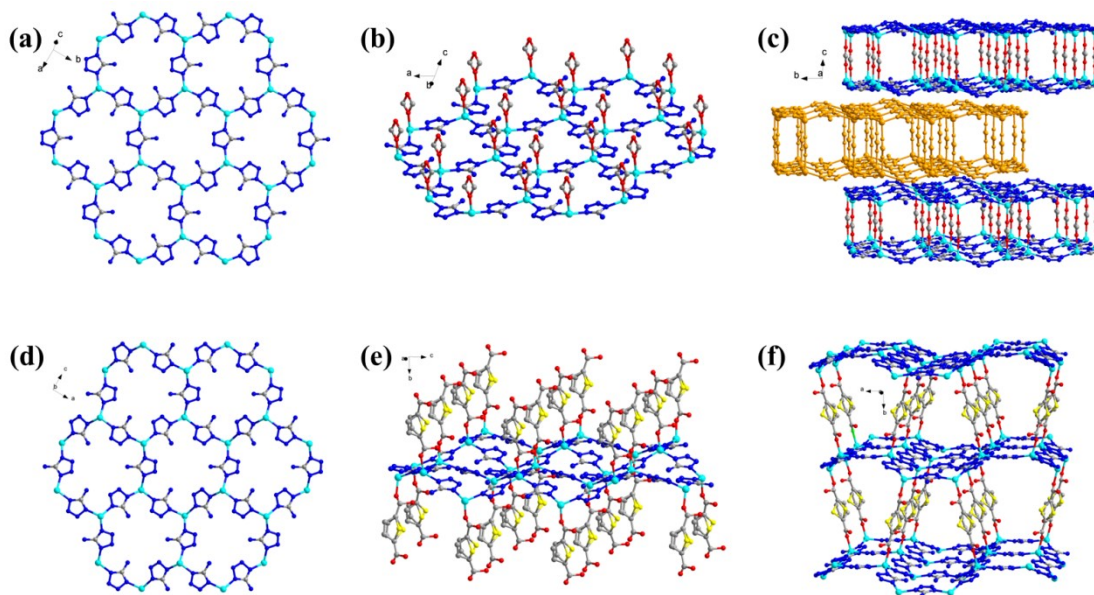

**FigureS4.** Structure of the honeycomb-shaped layer of BUT-25 (a) and BUT-26 (d) formed by  $\text{ATZ}^-$  ligands and  $\text{Zn}^{2+}$  ions.(b) The formate ions distributed on the same side of the honeycomb-shaped layer. (c) Bilayers pillared by formate ions in BUT-25. (e) The  $\text{TDC}^{2-}$  ligands distributed on the two sides of the honeycomb-shaped layer. (f) The 3D layer-pillared structure of BUT-26 <sup>1</sup>

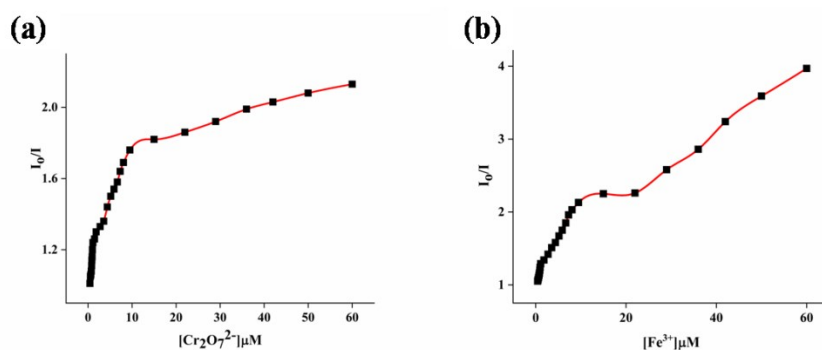

**Figure S5.** Stern-Volmer plot of BUT-27 suspension quenched by (a)  $\text{Cr}_2\text{O}_7^{2-}$  (b)  $\text{Fe}^{3+}$  with different concentrations.

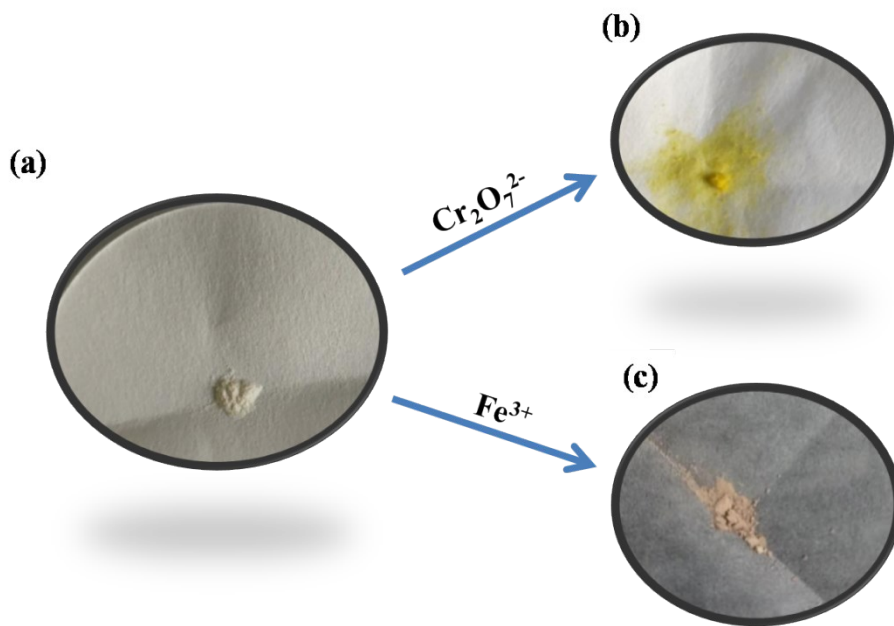

**Figure S6.** The photographs of BUT-27 samples. (a) as-synthesized sample; (b) after detection of  $\text{Cr}_2\text{O}_7^{2-}$  ions. (c) after detection of  $\text{Fe}^{3+}$  ions.

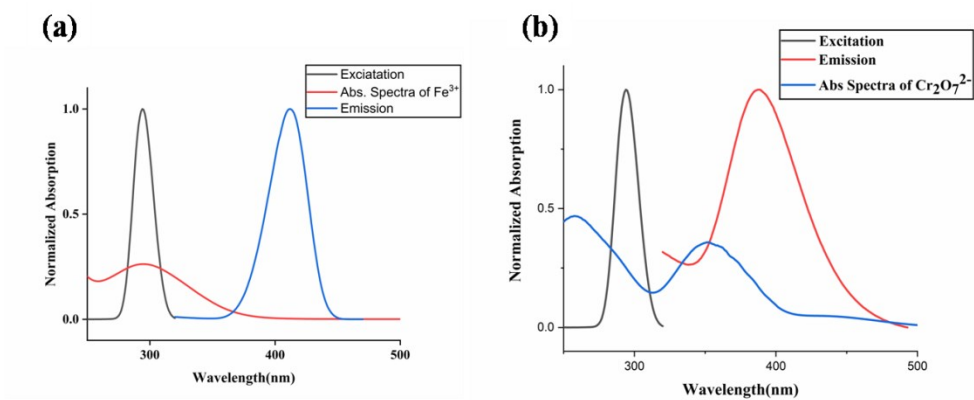

**Figure S7.** Spectral overlaps between UV-Vis absorption spectra of (a)  $\text{Fe}^{3+}$  (b)  $\text{Cr}_2\text{O}_7^{2-}$  ions, excitation and emission spectra of BUT-27.

**Table S1.** Crystal and Structure Refinement Data for BUT-27

|                                            |                                |
|--------------------------------------------|--------------------------------|
| Sample name                                | BUT-27                         |
| Formula                                    | $C_{44}H_{38}N_{40}O_{25}Zn_8$ |
| Formula Weight                             | 2048.5g/mol                    |
| Space group                                | Pm-3m                          |
| a                                          | 27.5455(2)Å                    |
| b                                          | 27.5455(2) Å                   |
| c                                          | 27.5455(2) Å                   |
| $\alpha$ (deg)                             | 90                             |
| $\beta$ (deg)                              | 90                             |
| $\gamma$ (deg)                             | 90                             |
| V                                          | 20900.3(5) Å <sup>3</sup>      |
| Z                                          | 3                              |
| D. calcd (g cm <sup>-3</sup> )             | 0.488                          |
| GOF on F <sup>2</sup>                      | 1.095                          |
| F(000)                                     | 3060.0                         |
| $\mu$ (mm <sup>-1</sup> )                  | 0.988                          |
| R <sub>int</sub>                           | 0.1051                         |
| R <sub>1</sub> /wR <sub>2</sub> (all Data) | 0.1234/3537                    |

**Table S2.** Comparison of Performance of Reported MOFs for Detecting Cr<sub>2</sub>O<sub>7</sub><sup>2-</sup>

| MOFs                                                                                           | K <sub>SV</sub> (M <sup>-1</sup> ) | Solvent                  | LOD μM | Ref              |
|------------------------------------------------------------------------------------------------|------------------------------------|--------------------------|--------|------------------|
| NMOF-2                                                                                         | 5.87x10 <sup>4</sup>               | Water                    | 0.004  | 2                |
| [Cd <sub>2</sub> (L1)(1,4-NDC) <sub>2</sub> ] <sub>n</sub>                                     | 5.86x10 <sup>4</sup>               | H <sub>2</sub> O         |        | 3                |
| [Zn <sub>2</sub> (4,4'-nba) <sub>2</sub> (1,4-bib) <sub>2</sub> ] <sub>n</sub>                 | 6.70x10 <sup>3</sup>               | H <sub>2</sub> O         | 3.8    | 4                |
| {[Zn <sub>2</sub> (TPOM)(NH <sub>2</sub> -BDC) <sub>2</sub> ·4H <sub>2</sub> O] <sub>n</sub> } | 7.79x10 <sup>3</sup>               | DMF                      | 3.9    | 5                |
| [Zn(btz)] <sub>n</sub>                                                                         | 4.23x10 <sup>3</sup>               | H <sub>2</sub> O         | 2      | 6                |
| [Zn(IPA)(3-PN)] <sub>n</sub>                                                                   | 1.37x10 <sup>3</sup>               | H <sub>2</sub> O         | 12.02  | 7                |
| [Cd(IPA)(3-PN)] <sub>n</sub>                                                                   | 2.91x10 <sup>3</sup>               | H <sub>2</sub> O         | 2.26   | 7                |
| BUT-28                                                                                         | 1.02x10 <sup>5</sup>               | H <sub>2</sub> O         | 0.12   | 8                |
| {[Cd(4BMPD)(BPDC)]·2H <sub>2</sub> O} <sub>n</sub> }                                           | 6.4x10 <sup>3</sup>                | H <sub>2</sub> O         | 37.6   | 9                |
| BUT-27                                                                                         | 5.9×10 <sup>4</sup>                | DMF/<br>H <sub>2</sub> O | 0.26   | <b>This work</b> |

**Table S3.** Comparison of Performance of Reported MOFs for Detecting Fe<sup>3+</sup>

| MOF                                                                                                             | Solvent                  | K <sub>SV</sub> (M <sup>-1</sup> ) | LOD μM | Ref              |
|-----------------------------------------------------------------------------------------------------------------|--------------------------|------------------------------------|--------|------------------|
| ZSB-1                                                                                                           | DMF                      |                                    | 0.05   | 10               |
| FJI-C8(Zn)                                                                                                      | DMF                      | 3.75 × 10 <sup>4</sup>             | 0.37   | 11               |
| {[Zn(L)(bpp)]·DMF} <sub>n</sub> }                                                                               | DMF                      | 2.56 × 10 <sup>4</sup>             | 7      | 12               |
| HPU-1 (Zn)                                                                                                      | H <sub>2</sub> O         | 1.0 × 10 <sup>4</sup>              | 1000   | 13               |
| Cd <sub>2</sub> (OBA) <sub>2</sub> (BPTP)(H <sub>2</sub> O)                                                     | DMF                      |                                    | 0.36   | 14               |
| [Zn(ATZ) <sub>1.5</sub> (TDC) <sub>0.5</sub> ] <sub>n</sub> NH <sub>2</sub> (CH <sub>3</sub> ) <sub>2</sub>     | DMF/H <sub>2</sub> O     | 1.7x10 <sup>5</sup>                | 0.1    | 1                |
| [Zr <sub>6</sub> O <sub>4</sub> (OH) <sub>4</sub> (2,7CDC) <sub>6</sub> ] <sub>n</sub> ·19H <sub>2</sub> O·2DMF | H <sub>2</sub> O         | 5.5 × 10 <sup>3</sup>              | 0.018  | 15               |
| Cu-MOFs                                                                                                         | H <sub>2</sub> O         |                                    | 0.5    | 16               |
| BUT-27                                                                                                          | DMF/<br>H <sub>2</sub> O | 1.1 × 10 <sup>3</sup>              | 0.19   | <b>This work</b> |

## REFERENCES

(1) Talha, K.; He, T.; Xie, L.-H.; Wang, B.; Zhao, M.-J.; Zhang, Y.-Z.; Chen, Q.; Li, J.-R. A three-dimensional metal–organic framework with high performance of dual cation sensing synthesized via single-crystal transformation. *New J. Chem.*, **2020**, *44*, 11829-11834.

- (2) Mukherjee, S.; Ganguly, S.; Samanta, D.; Das, D. Sustainable Green Route to Synthesize Functional Nano-MOFs as Selective Sensing Probes for CrVI Oxoanions and as Specific Sequestering Agents for  $\text{Cr}_2\text{O}_7^{2-}$ . *ACS Sustain. Chem. Eng.*, **2019**, *8*, 1195-1206.
- (3) Yang, Y.-J.; Li, Y.-H.; Liu, D.; Cui, G.-H. A dual-responsive luminescent sensor based on a water-stable Cd (II)-MOF for the highly selective and sensitive detection of acetylacetone and  $\text{Cr}_2\text{O}_7^{2-}$  in aqueous solutions. *CrystEngComm.*, **2020**, *22*, 1166-1175.
- (4) Xu, T.-Y.; Li, J.-M.; Han, Y.-H.; Wang, A.-R.; He, K.-H.; Shi, Z.-F. A new 3D four-fold interpenetrated dia-like luminescent Zn (ii)-based metal–organic framework: the sensitive detection of  $\text{Fe}^{3+}$ ,  $\text{Cr}_2\text{O}_7^{2-}$ , and  $\text{CrO}_4^{2-}$  in water, and nitrobenzene in ethanol. *New J. Chem.*, **2020**, *44*, 4011-4022.
- (5) Lv, R.; Wang, J.; Zhang, Y.; Li, H.; Yang, L.; Liao, S.; Gu, W.; Liu, X. An amino-decorated dual-functional metal–organic framework for highly selective sensing of Cr (III) and Cr (VI) ions and detection of nitroaromatic explosives. *J. Mater. Chem.*, **2016**, *4*, 15494-15500.
- (6) Cao, C.-S.; Hu, H.-C.; Xu, H.; Qiao, W.-Z.; Zhao, B. Two solvent-stable MOFs as a recyclable luminescent probe for detecting dichromate or chromate anions. *CrystEngComm.*, **2016**, *18*, 4445-4451.
- (7) Parmar, B.; Rachuri, Y.; Bisht, K. K.; Laiya, R.; Suresh, E. Mechanochemical and conventional synthesis of Zn (II)/Cd (II) luminescent coordination polymers: dual sensing probe for selective detection of chromate anions and TNP in aqueous phase. *Inorg. Chem.*, **2017**, *56*, 2627-2638.
- (8) Xu, M.-M.; Kong, X.-J.; He, T.; Wu, X.-Q.; Xie, L.-H.; Li, J.-R. A Stable Zr (IV)-Based Metal–Organic Framework Constructed from C=C Bridged Di-isophthalate Ligand for Sensitive Detection of  $\text{Cr}_2\text{O}_7^{2-}$  in Water. *Inorg. Chem.*, **2018**, *57*, 14260-14268.
- (9) Chen, S.; Shi, Z.; Qin, L.; Jia, H.; Zheng, H. Two new luminescent Cd (II)-metal–organic frameworks as bifunctional chemosensors for detection of cations  $\text{Fe}^{3+}$ , anions  $\text{CrO}_4^{2-}$ , and  $\text{Cr}_2\text{O}_7^{2-}$  in aqueous solution. *Cryst. Growth. Des.*, **2017**, *17*, 67-72.
- (10) Han, L. J.; Zheng, D.; Chen, S. G.; Zheng, H. G.; Ma, J. A Highly Solvent-Stable Metal–Organic Framework Nanosheet: Morphology Control, Exfoliation, and Luminescent Property. *Small* **2018**, *14*, 1703873.

- (11) Chen, C.-H.; Wang, X.-S.; Li, L.; Huang, Y.-B.; Cao, R. Highly selective sensing of Fe<sup>3+</sup> by an anionic metal–organic framework containing uncoordinated nitrogen and carboxylate oxygen sites. *Dalton Trans.*, **2018**, 47, 3452-3458.
- (12) Chen, Z.; Mi, X.; Wang, S.; Lu, J.; Li, Y.; Li, D.; Dou, J. Two novel penetrating coordination polymers based on flexible S-containing dicarboxylate acid with sensing properties towards Fe<sup>3+</sup> and Cr<sup>2O7</sup>2-ions. *J. Solid State Chem.*, **2018**, 261, 75-85.
- (13) Li, H.; He, Y.; Li, Q.; Li, S.; Yi, Z.; Xu, Z.; Wang, Y. Highly sensitive and selective fluorescent probe for Fe<sup>3+</sup> and hazardous phenol compounds based on a water-stable Zn-based metal–organic framework in aqueous media. *RSC Adv.*, **2017**, 7, 50035-50039.
- (14) Han, L.-J.; Yan, W.; Chen, S.-G.; Shi, Z.-Z.; Zheng, H.-G. Exploring the detection of metal ions by tailoring the coordination mode of V-Shaped thienylpyridyl ligand in three MOFs. *Inorg. Chem.*, **2017**, 56, 2936-2940.
- (15) Das, A.; Biswas, S. A multi-responsive carbazole-functionalized Zr (IV)-based metal-organic framework for selective sensing of Fe (III), cyanide and p-nitrophenol. *Sens. Actuators, B.*, **2017**, 250, 121-131.
- (16) Ming, F.; Hou, J.; Huo, D.; Zhou, J.; Yang, M.; Shen, C.; Zhang, S.; Hou, C. Copper-based metal–organic framework nanoparticles for sensitive fluorescence detection of ferric ions. *Anal. Methods*, **2019**, 11, 4382-4389.
